# Supplementary material for: Two-Step Solid State Synthesis of Medium Entropy LiNi0.5Mn1.5O4 Cathode with Enhanced Electrochemical Performance
Source: MDPI journal article supplement (doi:10.3390/batteries9020091), 2023-01-29
Supplement: s1 [file s1]

Archive with 1 entries (1 files):
- batteries-2105769-supplementary.pdf
