# Supplementary material for: Two-Step Solid State Synthesis of Medium Entropy LiNi0.5Mn1.5O4 Cathode with Enhanced Electrochemical Performance
Source: MDPI journal article supplement (doi:10.3390/batteries9020091), 2023-01-29
Supplement: s1 [file s1 › batteries-2105769-supplementary.pdf]

## Supplementary Information

### Two-step solid-state synthesis of medium entropy $\text{LiNi}_{0.5}\text{Mn}_{1.5}\text{O}_4$ cathode with enhanced electrochemical performance

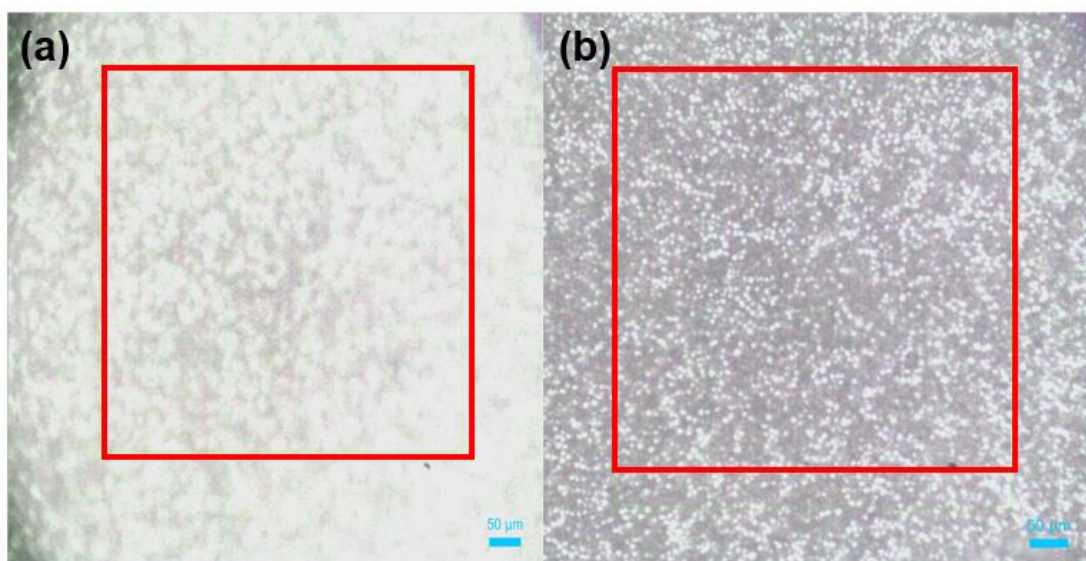

**Figure S1.** The optical image and Raman imaging selection region of (a) LNMO and (b) T-LNMO.

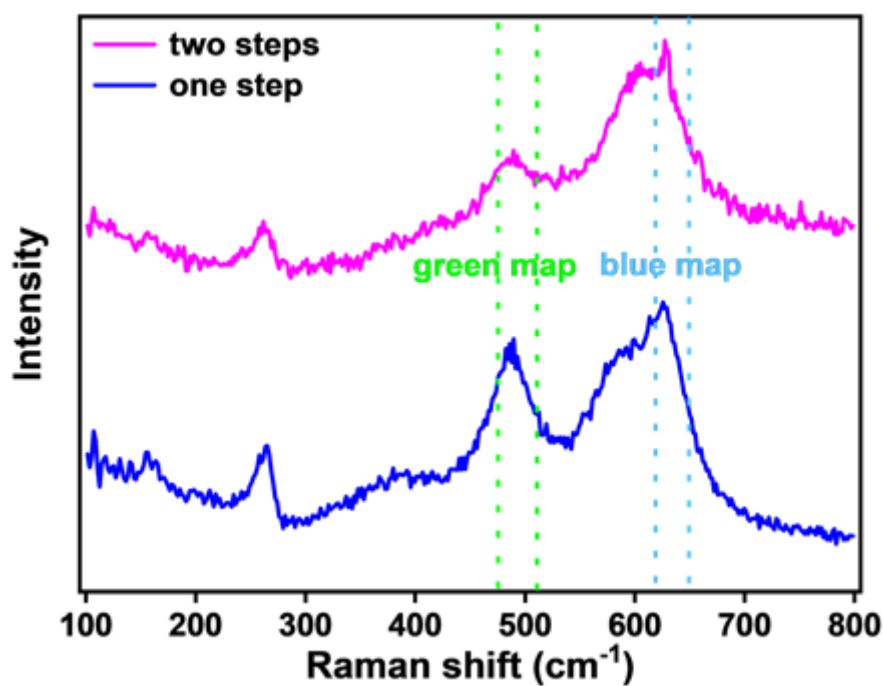

**Figure S2.** The green map area around 497 cm<sup>-1</sup>, and the blue map area around 631 cm<sup>-1</sup> in both samples.

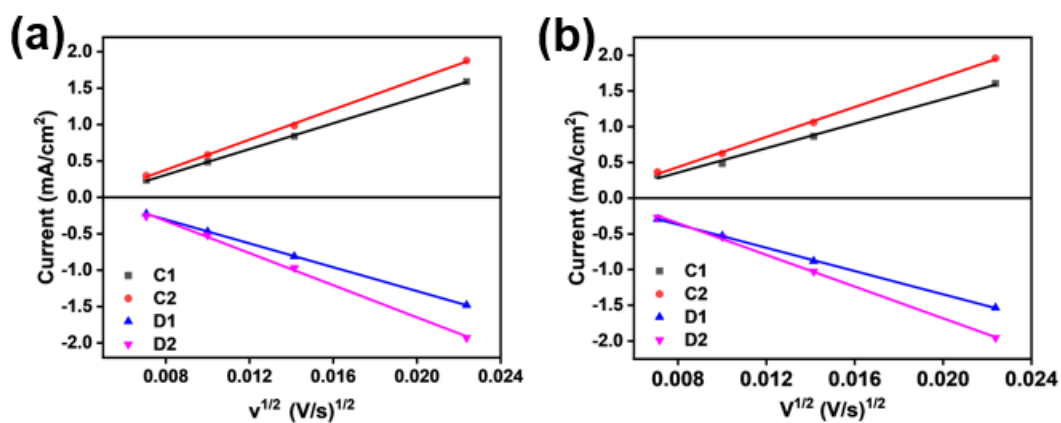

**Figure S3.** The relationships between the cathodic and anodic peak currents and the square root of the scan rate of (a) LNMO and (b) T-LNMO.

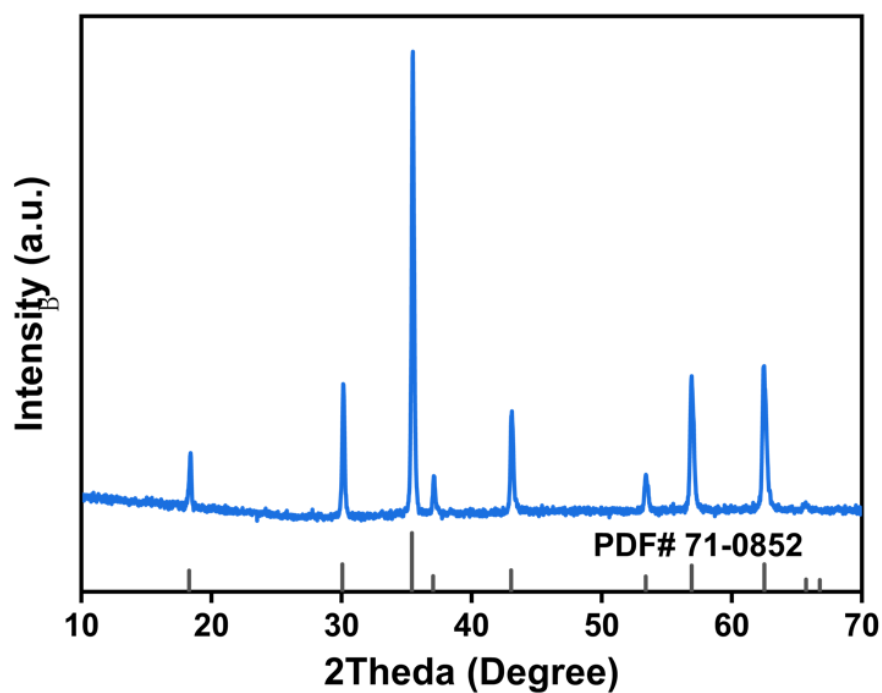

**Figure S4.** The XRD pattern of the multi-component precursor  $\text{Ni}_{0.475}\text{Co}_{0.025}\text{Cr}_{0.025}\text{Al}_{0.025}\text{Mn}_{1.45}\text{O}_{4-x}$ .

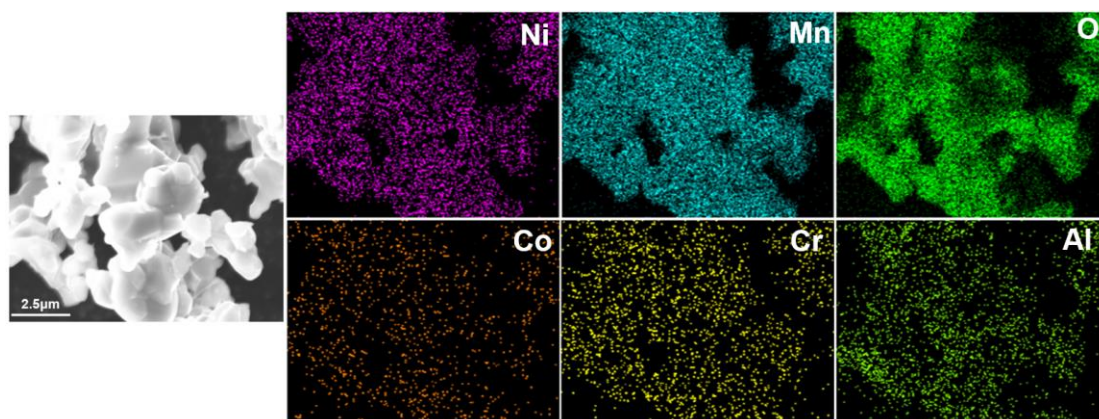

**Figure S5.** SEM image and EDS analysis of the multi-component precursor  $\text{Ni}_{0.475}\text{Co}_{0.025}\text{Cr}_{0.025}\text{Al}_{0.025}\text{Mn}_{1.45}\text{O}_{4-x}$ .

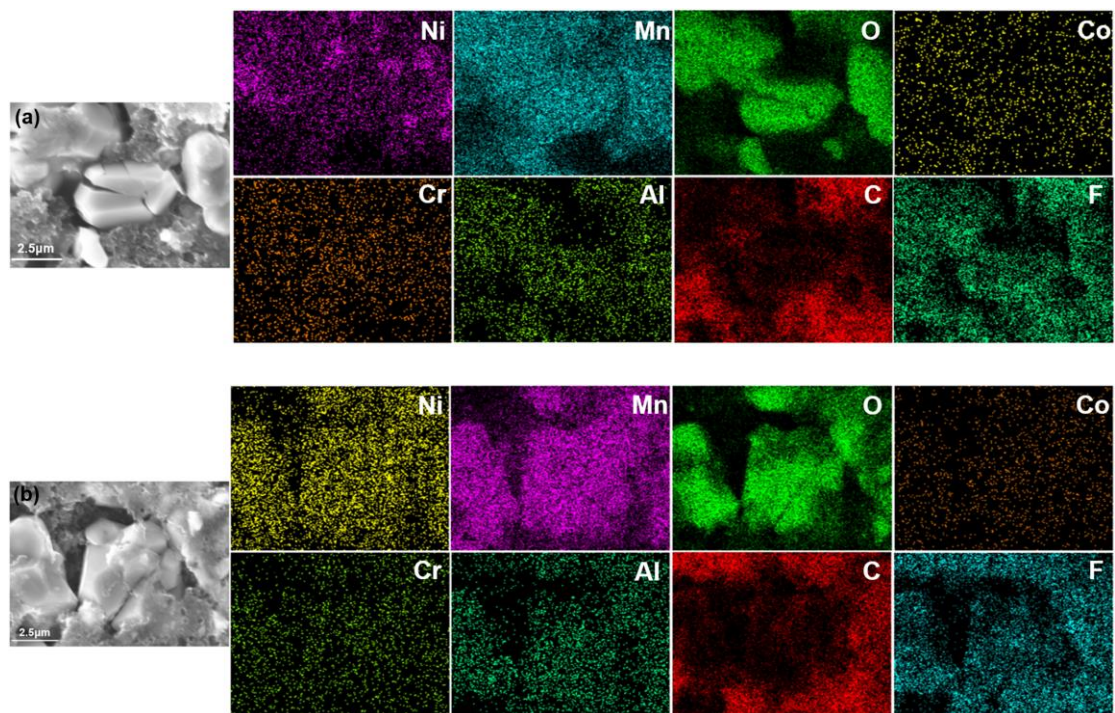

**Figure S6.** EDS analysis of (a) LNMO and (b) T-LNMO electrodes after 200 cycles at 1 C.

**Table S1.** The atomic ratio by XPS analysis results of both samples.

| Samples       | PP At. (%) of each element |      |       |      |      |      |       |      |
|---------------|----------------------------|------|-------|------|------|------|-------|------|
|               | Li                         | Ni   | Mn    | Co   | Cr   | Al   | O     | C    |
| <b>LNMO</b>   | 41.54                      | 4.39 | 12.54 | 0.33 | 0.14 | 2.02 | 33.86 | 5.18 |
| <b>T-LNMO</b> | 41.84                      | 4.41 | 12.71 | 0.36 | 0.17 | 2.05 | 32.64 | 5.82 |
